# Supplementary material for: Polycondensation of methacrylates: auto-tandem organocatalysis using N-heterocyclic carbenes
Source: Royal Society of Chemistry journal article supplement (doi:10.1039/c8py01027g), 2018-01-01
Supplement: c8py01027g1.pdf [file c8py01027g1.pdf]

*Supporting Information for*

**Polycondensation of methacrylates: Auto-tandem organocatalysis using  
N-heterocyclic carbene**

Aoi Fukumoto, Miharu Arimoto, Shin-ichi Matsuoka,\* Masato Suzuki

Department of Life Science and Applied Chemistry, Graduate School of Engineering,

Nagoya Institute of Technology, Gokiso-cho, Showa-ku, Nagoya, Aichi 466-8555, Japan

Fax: +81-52-735-5442; Tel: +81-52-735-7254;

E-mail: [matsuoka.shinichi@nitech.ac.jp](mailto:matsuoka.shinichi@nitech.ac.jp)

## Contents

|                                                                                                |    |
|------------------------------------------------------------------------------------------------|----|
| Figure S1. $^1\text{H}$ NMR spectrum of Poly1. ....                                            | 3  |
| Figure S2. $^{13}\text{C}$ NMR spectrum of Poly1. ....                                         | 4  |
| Figure S3. $^1\text{H}$ NMR spectrum of Poly2. ....                                            | 5  |
| Figure S4. $^{13}\text{C}$ NMR spectrum of Poly2. ....                                         | 6  |
| Figure S5. $^1\text{H}$ NMR spectrum of Poly3. ....                                            | 7  |
| Figure S6. $^{13}\text{C}$ NMR spectrum of Poly3. ....                                         | 8  |
| Figure S7. $^1\text{H}$ NMR spectrum of the polymer obtained from <i>n</i> BMA and 7. ....     | 9  |
| Figure S8. $^{13}\text{C}$ NMR spectrum of the polymer obtained from <i>n</i> BMA and 7. ....  | 10 |
| Figure S9. $^1\text{H}$ NMR spectrum of the polymer obtained from <i>n</i> BMA and 8. ....     | 11 |
| Figure S10. $^{13}\text{C}$ NMR spectrum of the polymer obtained from <i>n</i> BMA and 8. .... | 12 |
| Figure S11. $^1\text{H}$ NMR spectrum of the polymer obtained from <i>n</i> BMA and 9. ....    | 13 |
| Figure S12. $^{13}\text{C}$ NMR spectrum of the polymer obtained from <i>n</i> BMA and 9. .... | 14 |
| Figure S13. $^1\text{H}$ NMR spectrum of the copolymer obtained from 1 and 2. ....             | 15 |
| Figure S14. ESI-MS spectrum of Poly 1. ....                                                    | 16 |
| Figure S15. ESI-MS spectrum of the polymer obtained from <i>n</i> BMA and 9. ....              | 17 |
| Figure S16. SEC curves of Poly1 (Table 1) ....                                                 | 18 |

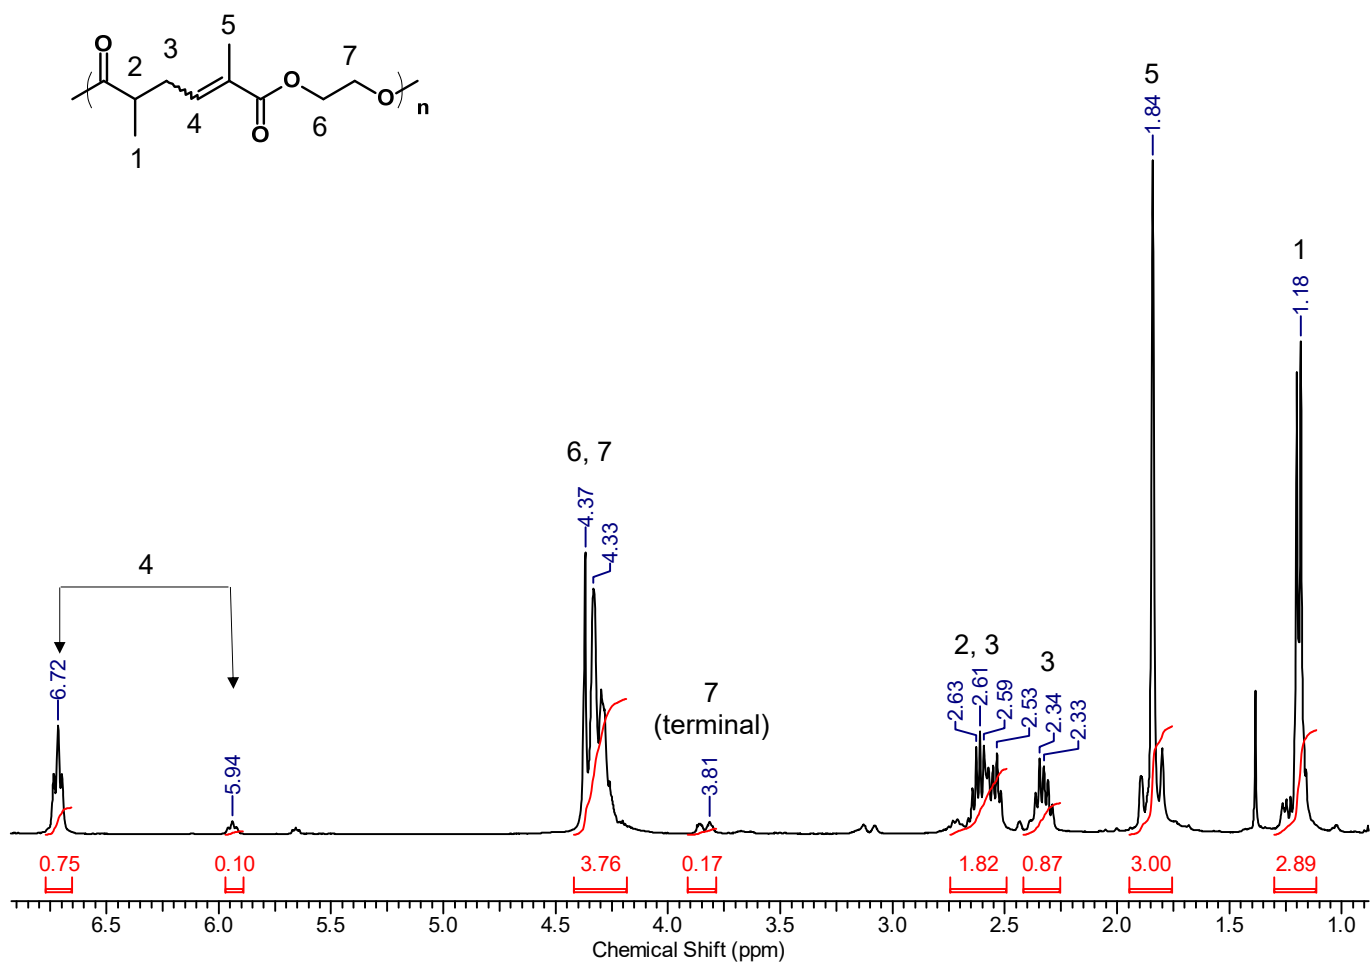

Figure S1.  $^1\text{H}$  NMR spectrum of Poly1.

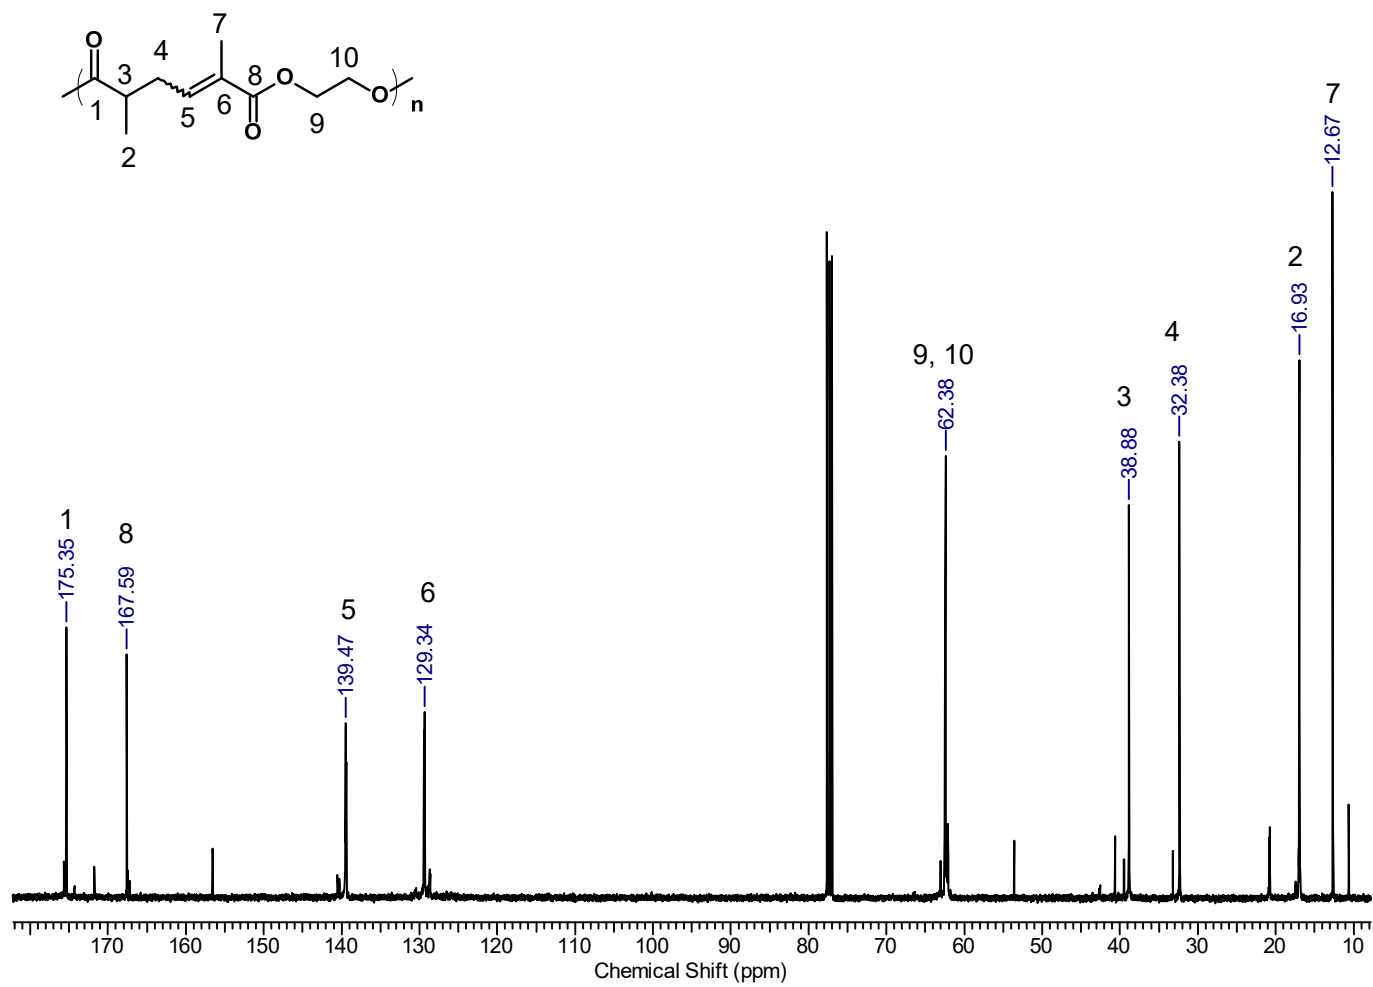

Figure S2.  $^{13}\text{C}$  NMR spectrum of Poly1.

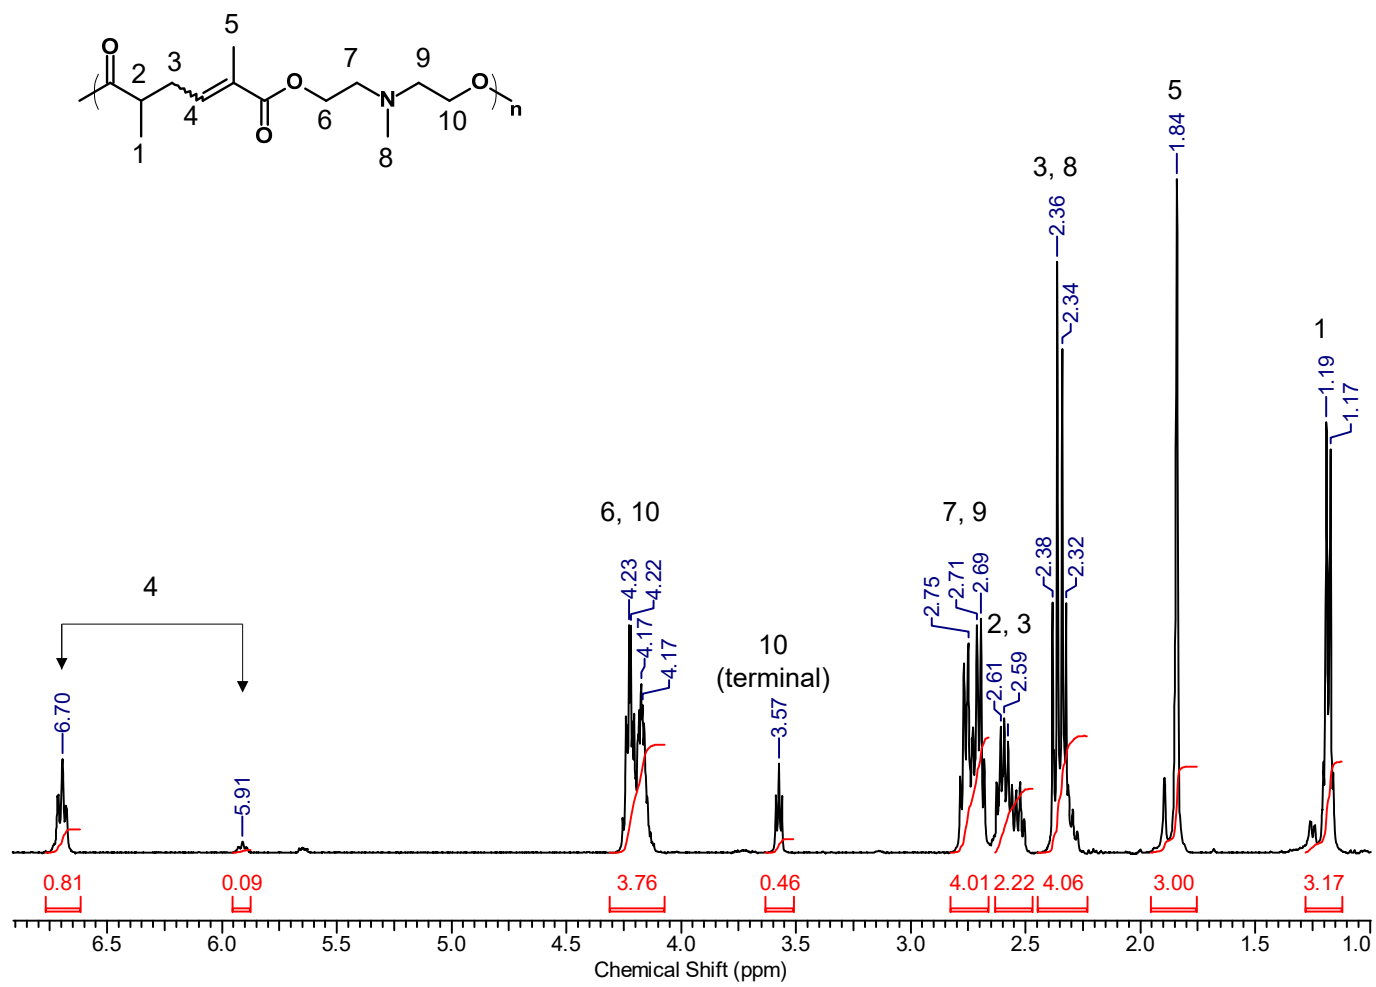

Figure S3. <sup>1</sup>H NMR spectrum of Poly2.

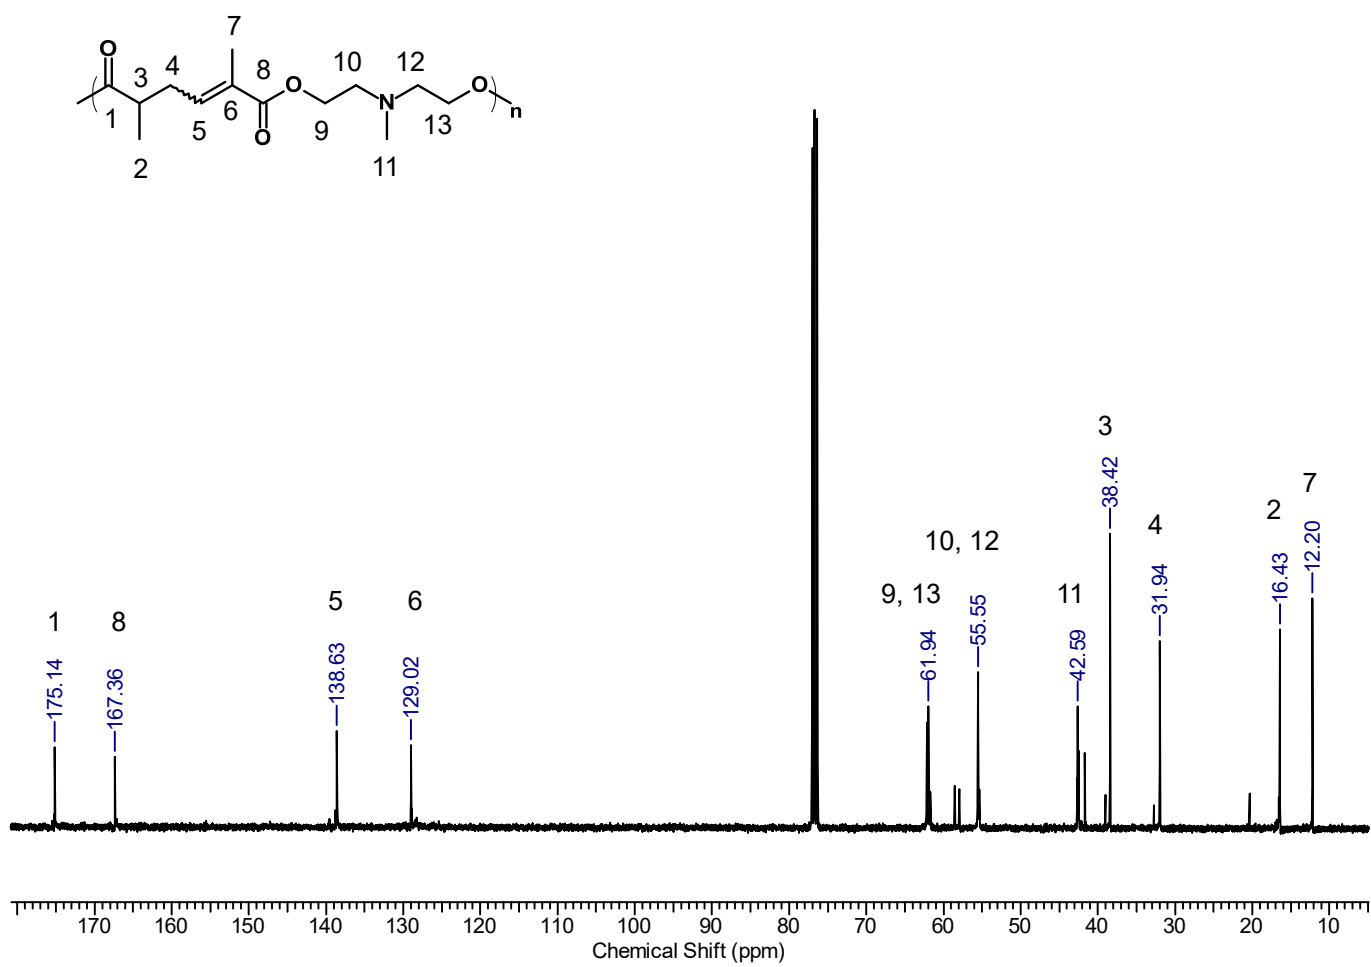

Figure S4.  $^{13}\text{C}$  NMR spectrum of Poly2.

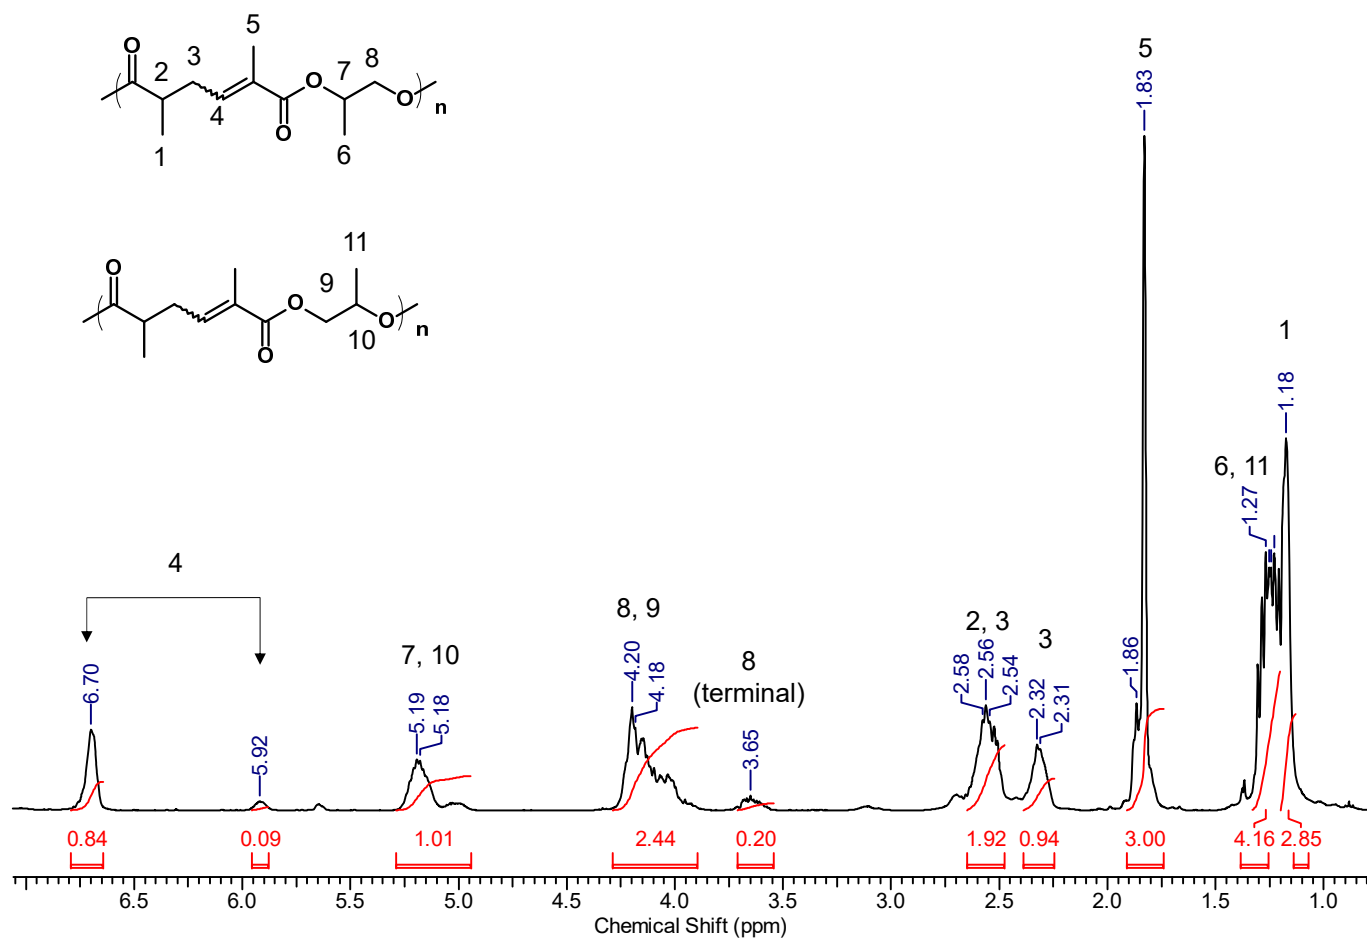

Figure S5. <sup>1</sup>H NMR spectrum of Poly3.

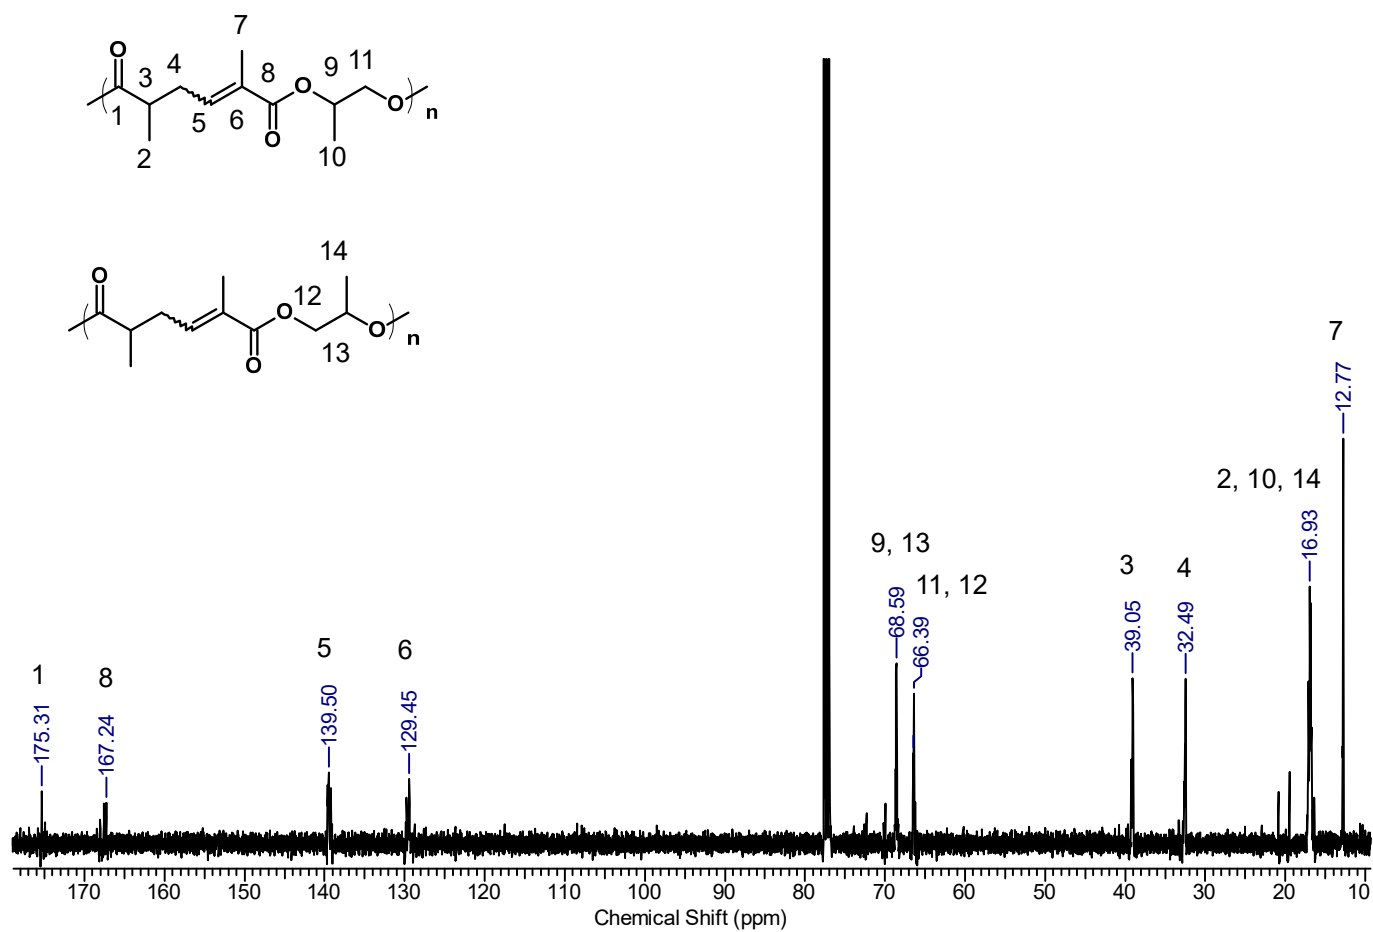

Figure S6.  $^{13}\text{C}$  NMR spectrum of Poly3.



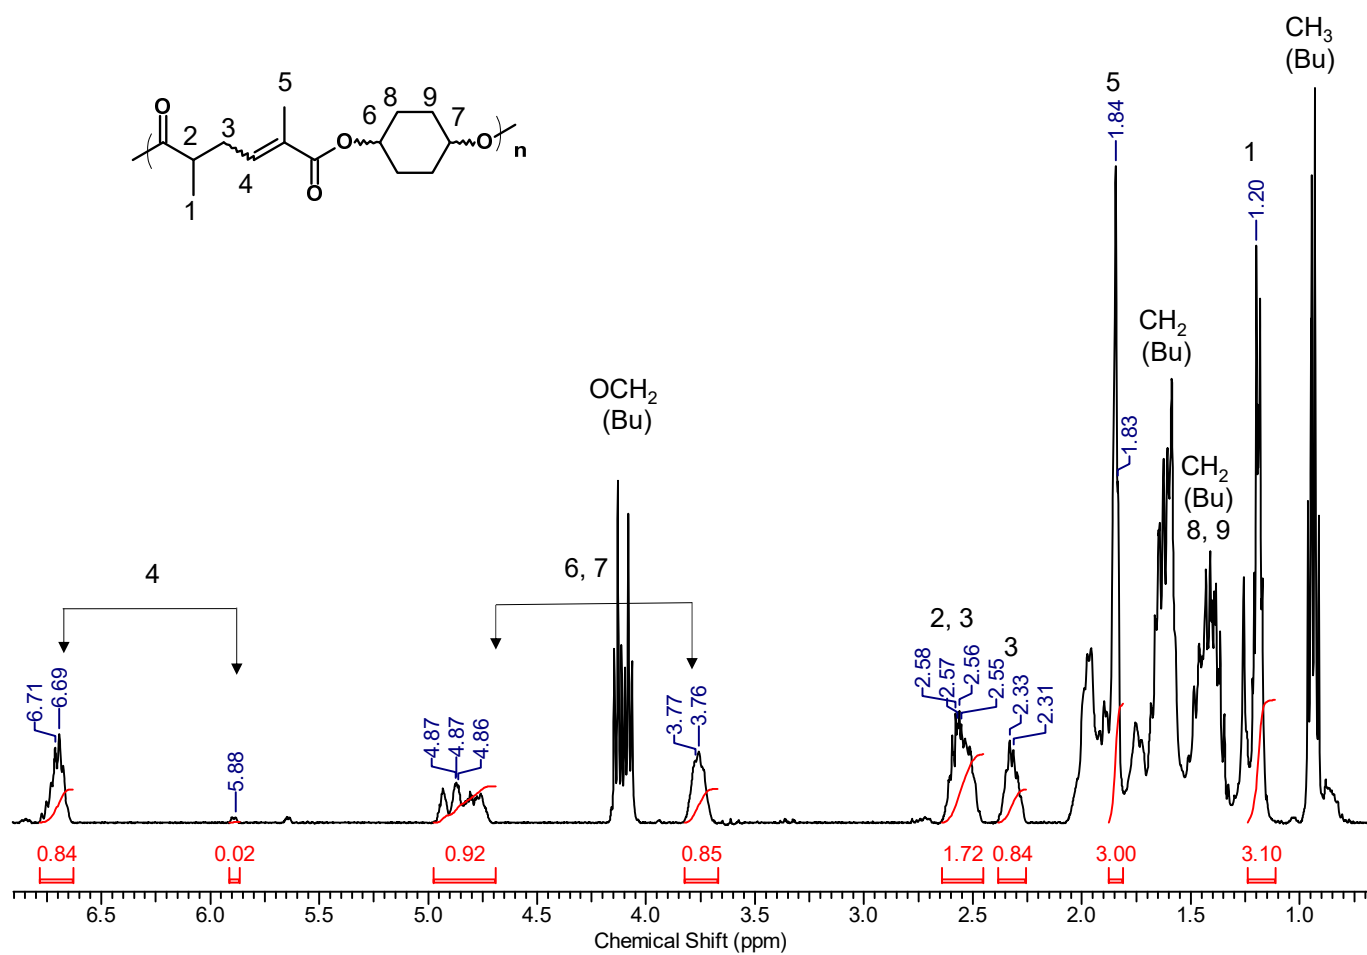

Figure S7. <sup>1</sup>H NMR spectrum of the polymer obtained from *n*BMA and 7.

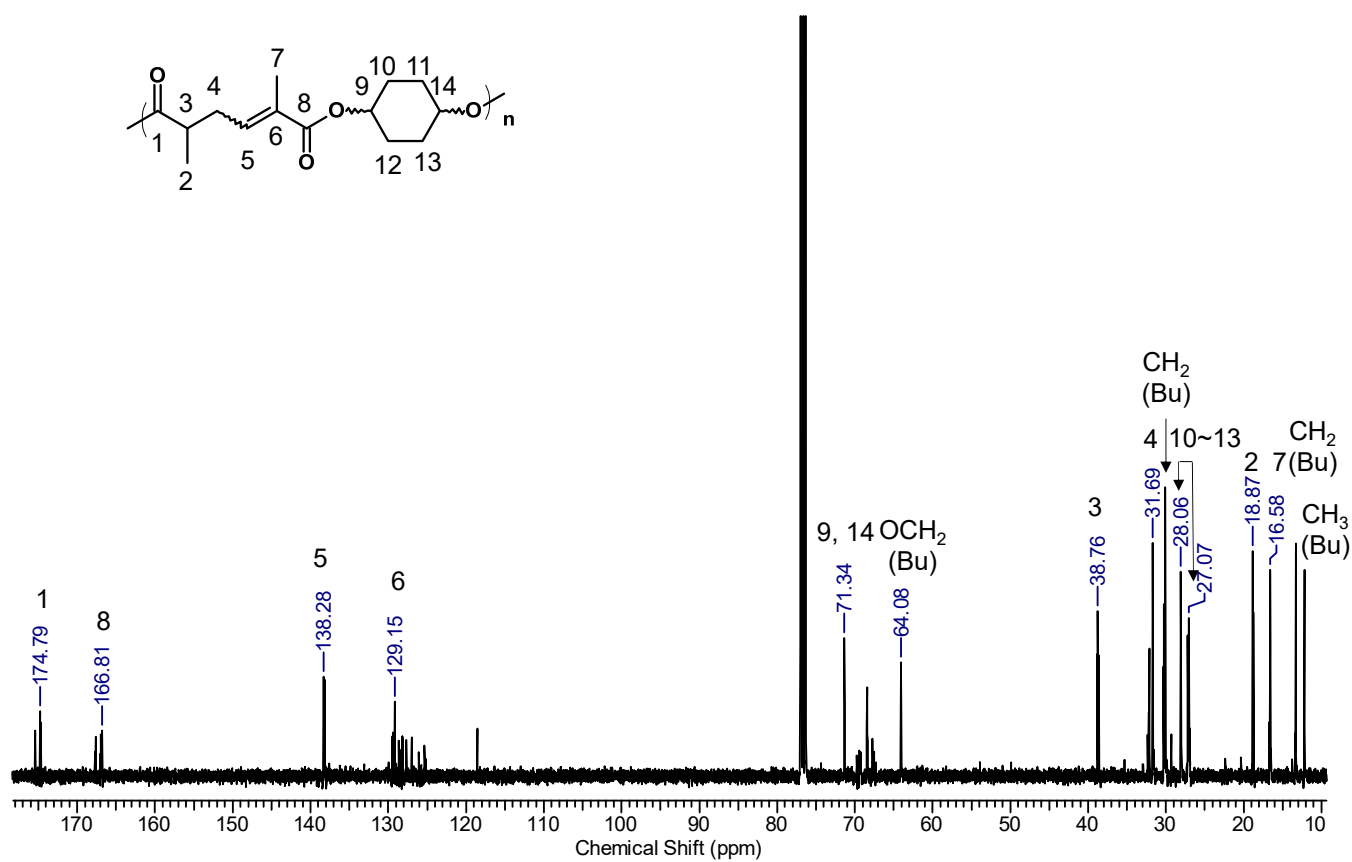

Figure S8.  $^{13}\text{C}$  NMR spectrum of the polymer obtained from *n*BMA and 7.

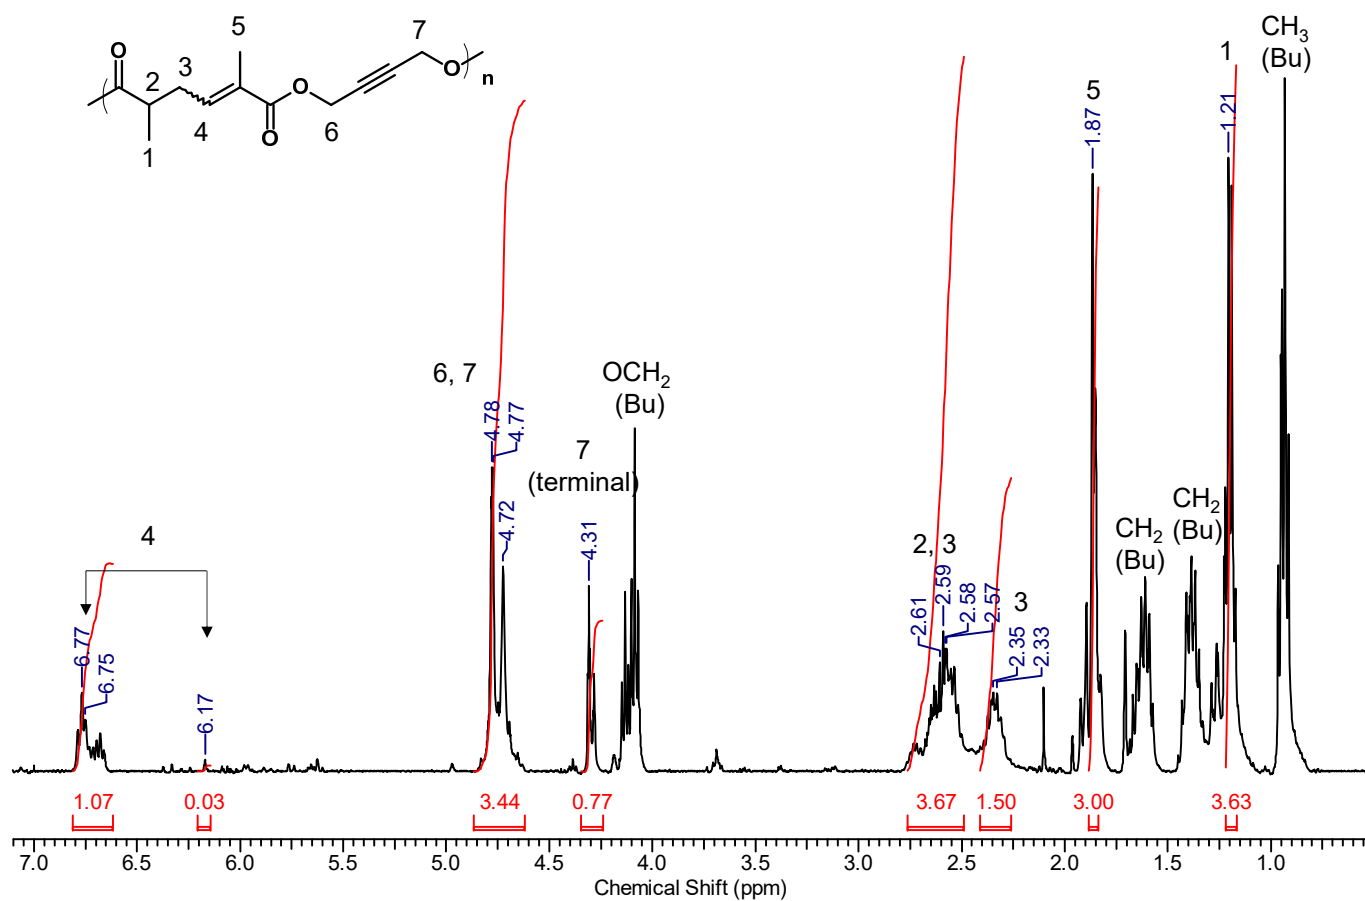

Figure S9.  $^1\text{H}$  NMR spectrum of the polymer obtained from *n*BMA and **8**.

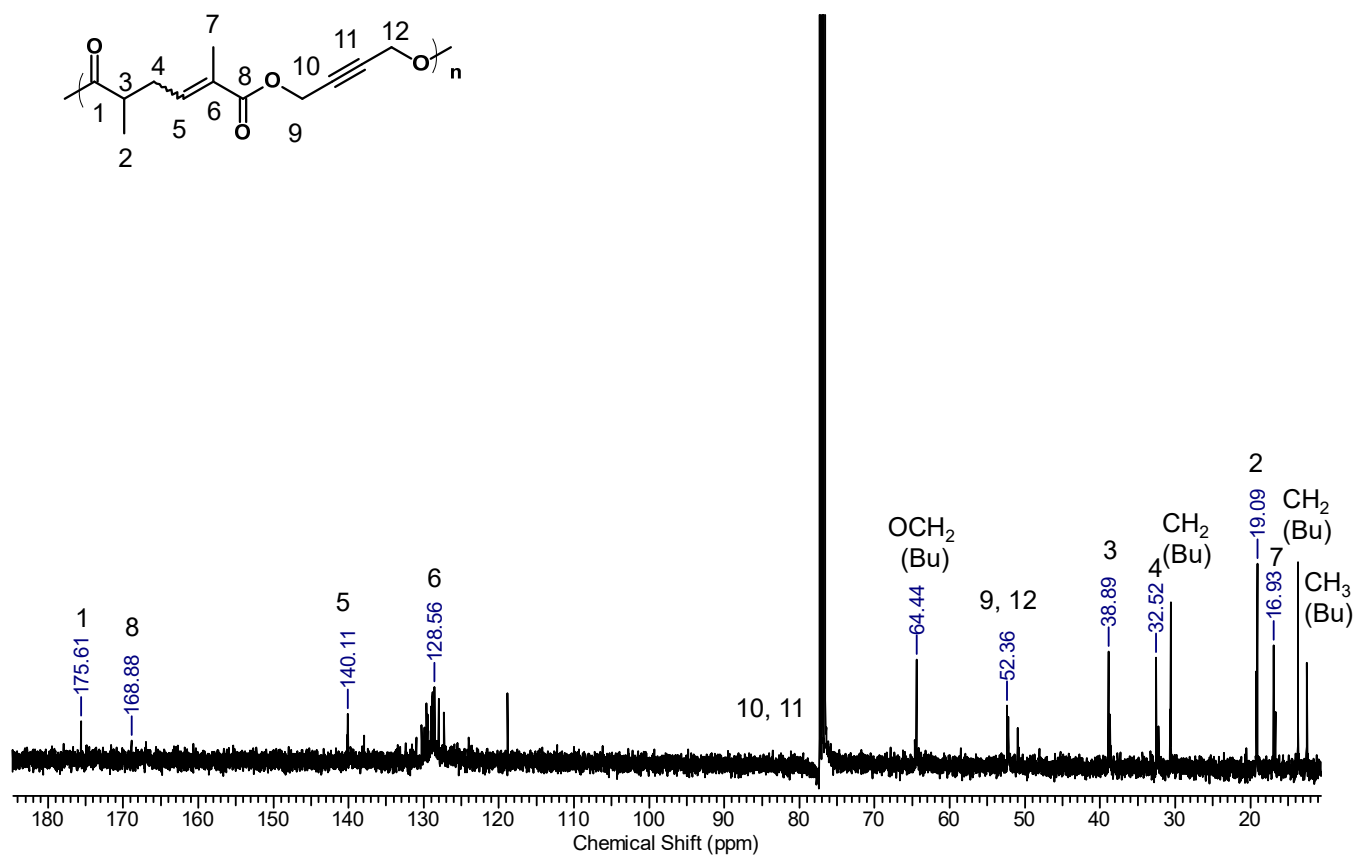

Figure S10.  $^{13}\text{C}$  NMR spectrum of the polymer obtained from *n*BMA and **8**.

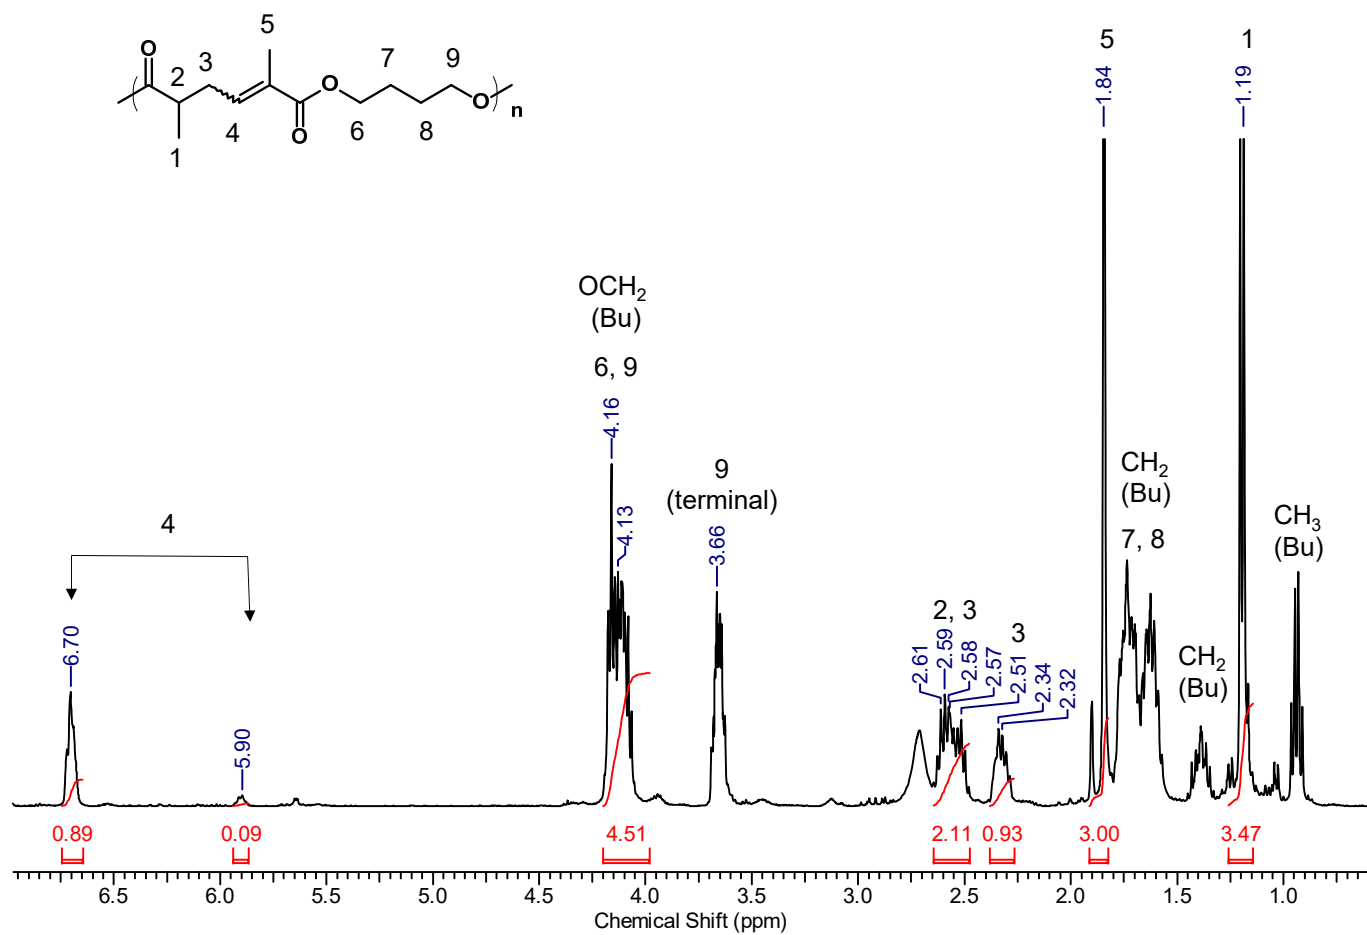

Figure S11.  $^1\text{H}$  NMR spectrum of the polymer obtained from *n*BMA and **9**.

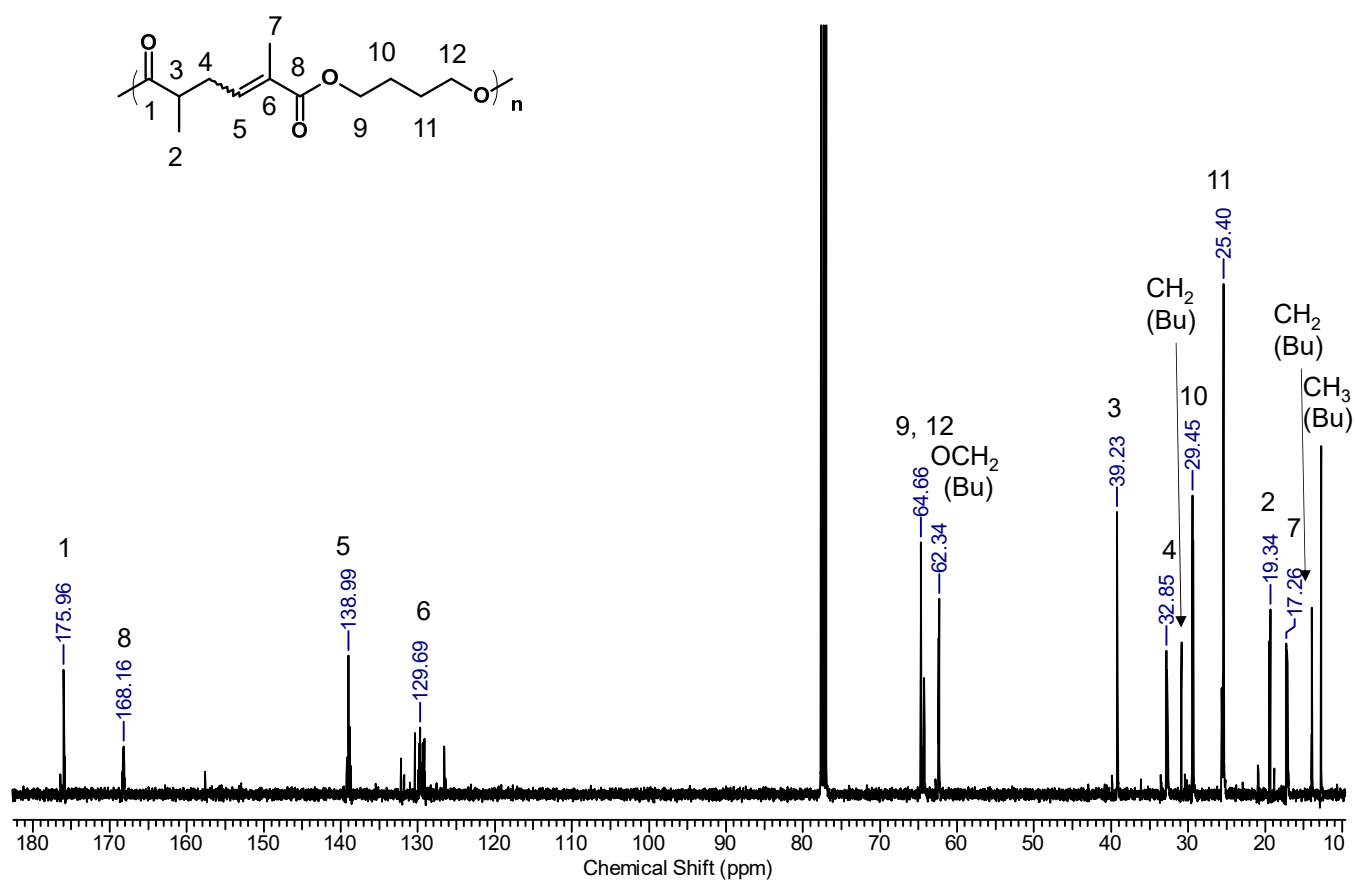

Figure S12.  $^{13}\text{C}$  NMR spectrum of the polymer obtained from *n*BMA and **9**.

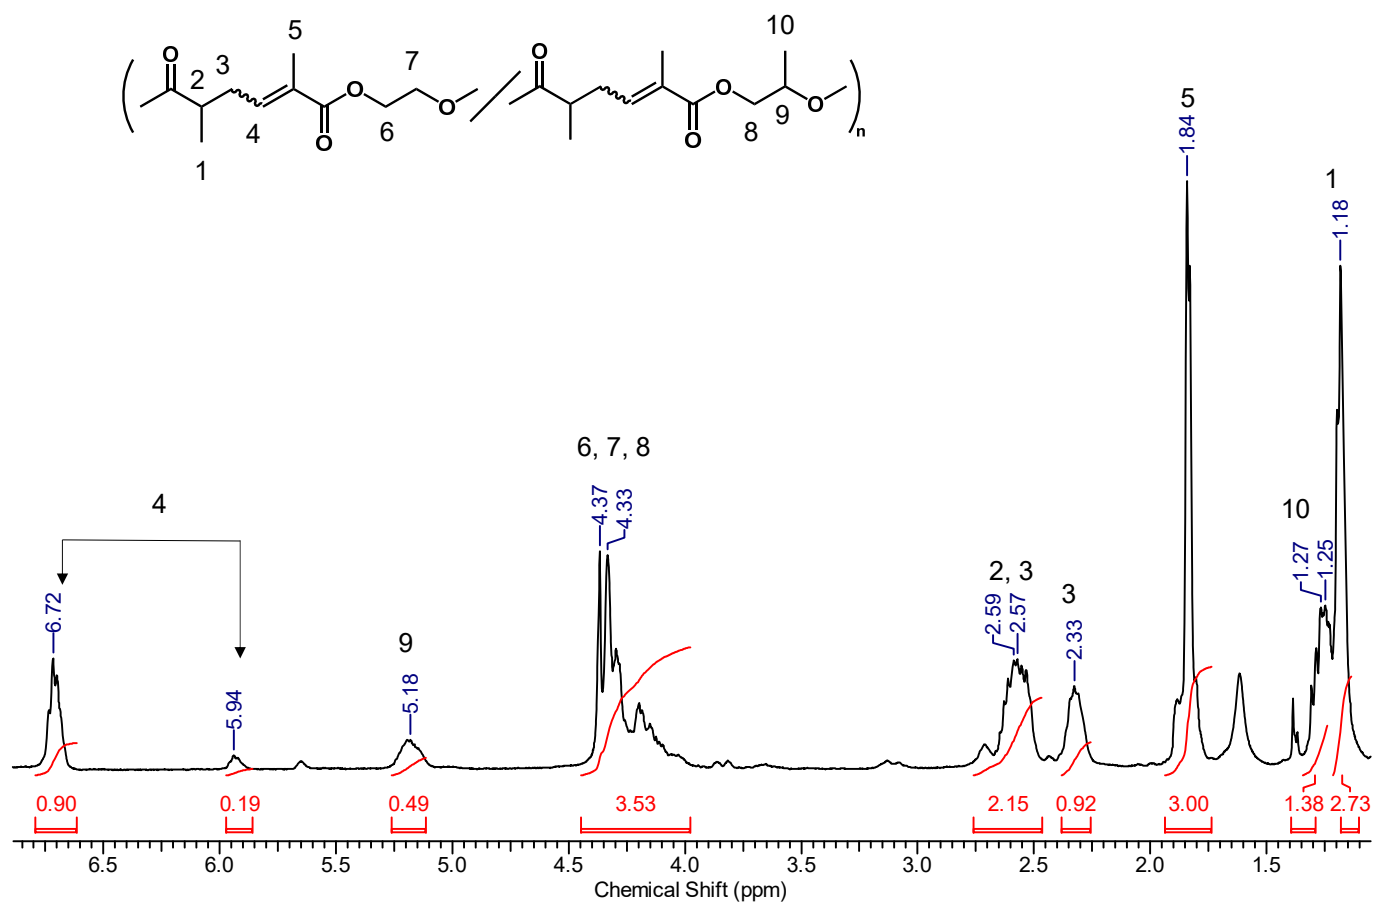

Figure S13. <sup>1</sup>H NMR spectrum of the copolymer obtained from **1** and **2**.

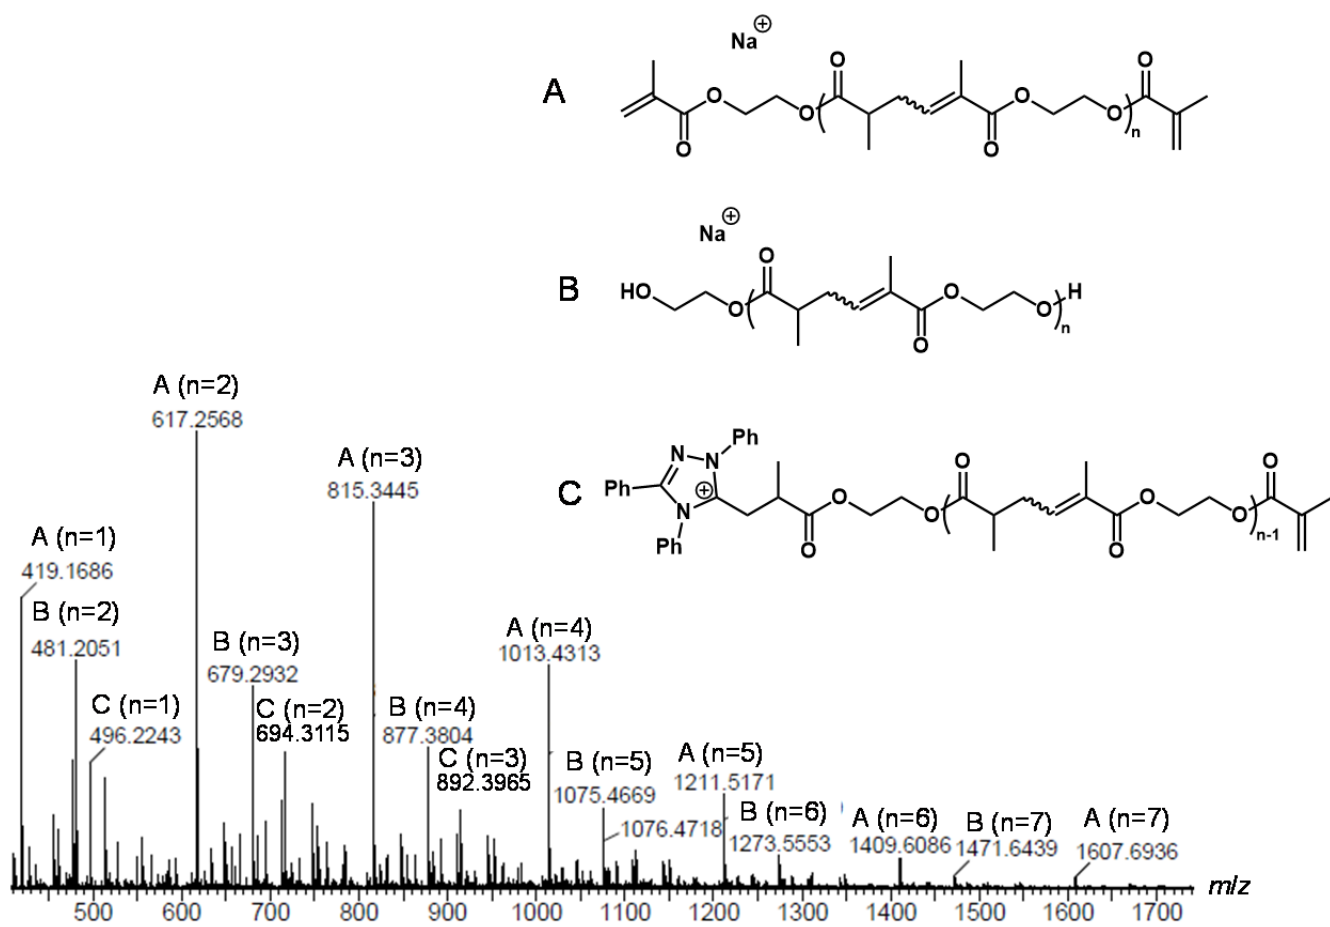

Figure S14. ESI-MS spectrum of Poly 1.



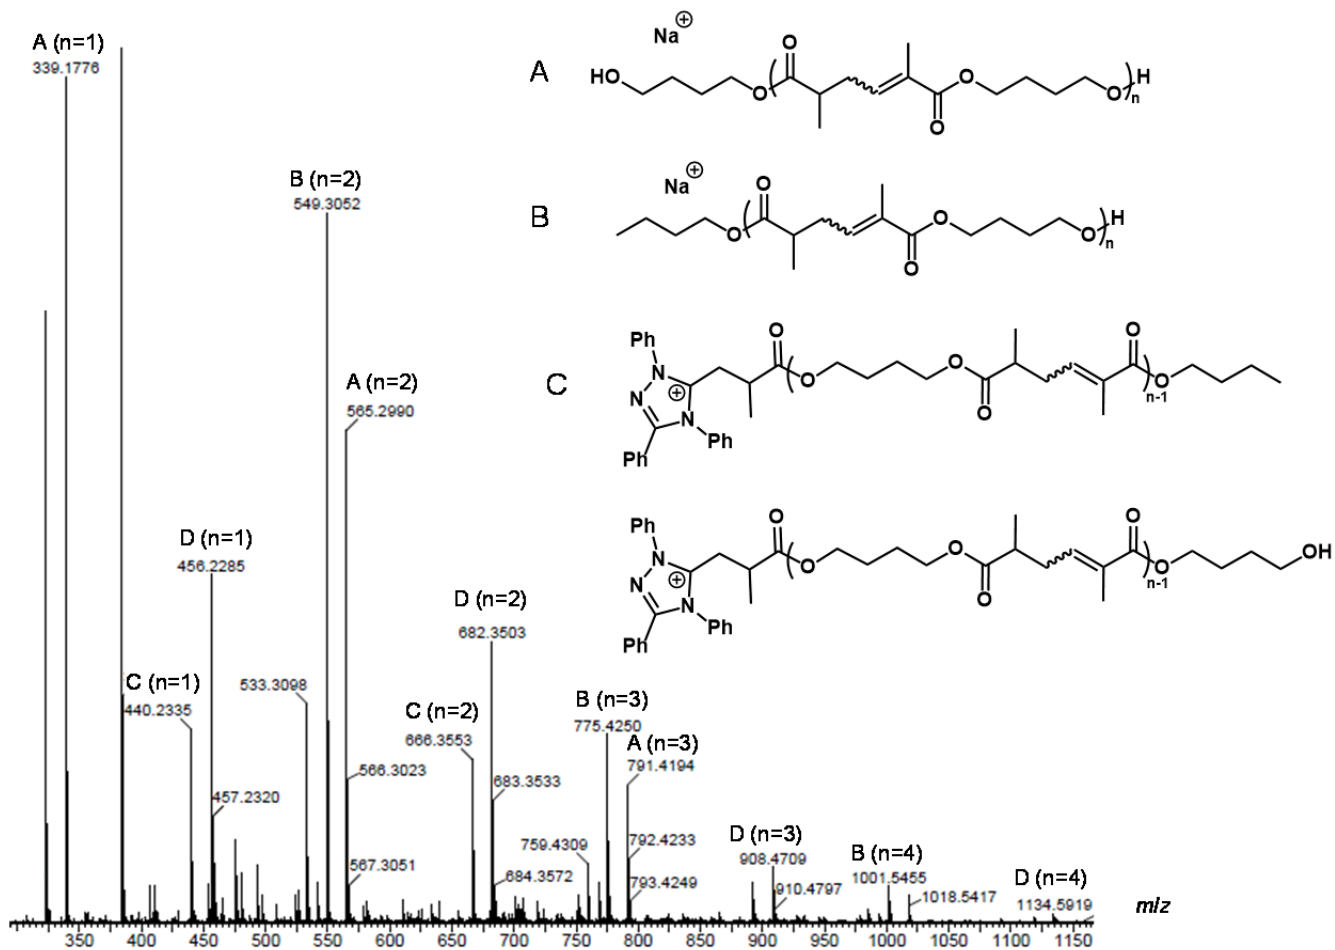

Figure S15. ESI-MS spectrum of the polymer obtained from *n*BMA and **9**.

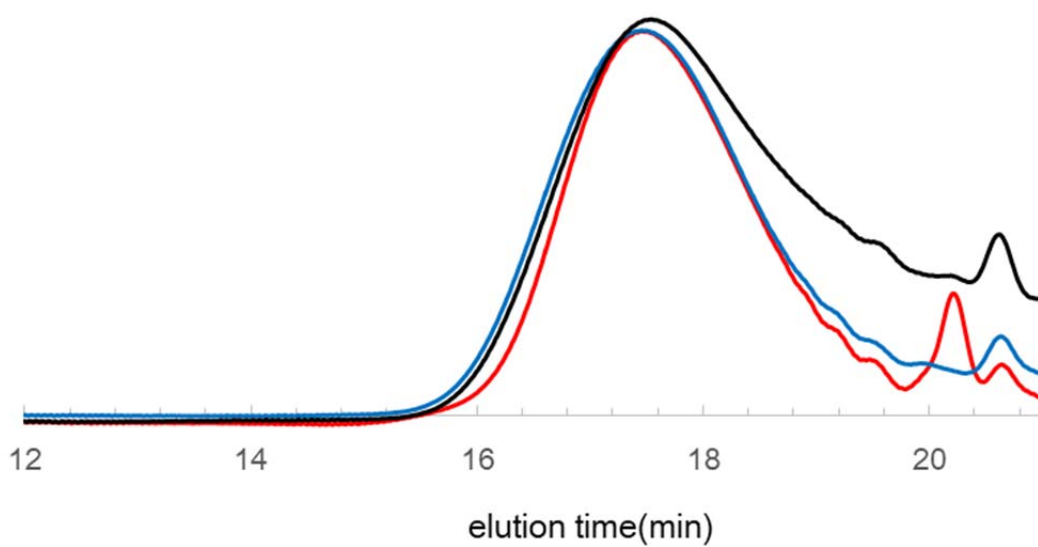

Figure S16. SEC curves of Poly1 (Table 1)

(black line; TPT-MeOH 10 mol%, entry 5, blue line; TPT-MeOH 5 mol%, entry 6,

red line ; TPT-MeOH 2 mol%, entry 4) .
